# Supplementary material for: Endovis Nail versus Dynamic Hip Screw for Unstable Pertrochanteric Fractures: A Feasibility Randomised Control Trial including Patients with Cognitive Impairment
Source: MDPI journal article supplement (doi:10.3390/jcm12134237), 2023-06-23
Supplement: s1 [file s1]

## Supplementary Materials:

**Table S1:** Patients baseline demographics; ASA: American Society of Anesthesiologist score, AMTS: Abbreviated Mental Test Score, LEM: Lower Extremity Measure, LHS: London Handicap Scale, DEMQOL: Dementia Quality of Life

|                                                           | <b>Nail</b>      | <b>DHS</b>       | <b>p-Value</b> |
|-----------------------------------------------------------|------------------|------------------|----------------|
| <b>Number of patients</b>                                 | 29               | 28               |                |
| <b>Age, mean <math>\pm</math> SD</b>                      | 85.7 $\pm$ 5.5   | 84.1 $\pm$ 9.1   | 0.428          |
| <b>Female, n(%)</b>                                       | 23 (79.3%)       | 23 (82.1%)       | 0.786          |
| <b>ASA, n(%)</b>                                          |                  |                  | 0.093          |
| 2                                                         | 8 (27.6%)        | 9 (32.1%)        |                |
| 3                                                         | 16 (55.2%)       | 19 (67.9%)       |                |
| 4                                                         | 5 (17.2%)        | 0                |                |
| <b>Charlson comorbidity index, mean<math>\pm</math>SD</b> | 5.36 $\pm$ 1.3   | 5.1 $\pm$ 1.6    | 0.445          |
| <b>Pre-op Hb (g/L), mean <math>\pm</math> SD</b>          | 119.2 $\pm$ 15.6 | 118 $\pm$ 12.6   | 0.750          |
| <b>Hb &lt; 100g/L, n(%)</b>                               | 4 (13.8%)        | 1 (3.6%)         | 0.352          |
| <b>Cognitive status</b>                                   |                  |                  | 1.000          |
| AMTS $\geq$ 8                                             | 18 (62.1%)       | 18 (64.3%)       |                |
| AMTS < 8                                                  | 11 (37.9%)       | 10 (35.7%)       |                |
| <b>Pre-injury residential status, n(%)</b>                |                  |                  | 0.619          |
| Home                                                      | 23 (79.3%)       | 23 (82.1%)       |                |
| With family                                               | -                | 1 (3.6%)         |                |
| Residential home                                          | 4 (13.8%)        | 4 (14.3%)        |                |
| Nursing home                                              | 2 (6.9%)         | -                |                |
| <b>Pre-injury mobility status</b>                         |                  |                  | 0.329          |
| No aids                                                   | 10 (34.5%)       | 8 (28.6%)        |                |
| With stick                                                | 8 (27.6%)        | 12 (42.6%)       |                |
| With frame                                                | 11 (37.9%)       | 6 (21.4%)        |                |
| Unknown                                                   | -                | 2 (7.1%)         |                |
| <b>Pre-injury-, median(range)</b>                         |                  |                  |                |
| LEM                                                       | 59.5 (31.3–100)  | 67.3 (48.3–93.8) | 0.309          |
| LHS                                                       | 0.66 (0.53–1.00) | 0.73 (0.54–1.00) | 0.554          |
| DEMQOL                                                    | 87.0 (69–95)     | 73.6 (40–108)    | 0.382          |
| DEMQOL (carer)                                            | 99.2 (84–117)    | 97.6 (64–115)    | 0.693          |

**Table S2:** Mortality rates as per AMTS group at 2, 4, 12 weeks and at 1 year.

| <b>Mortality Rates, n(%)</b> | <b>AMTS <math>\geq</math> 8<br/>n = 36</b> | <b>AMTS &lt; 8<br/>n = 21</b> | <b>p-Value</b> |
|------------------------------|--------------------------------------------|-------------------------------|----------------|
| <b>2 weeks</b>               | 0 (0%)                                     | 3 (14.3%)                     | <b>0.046</b>   |
| <b>4 weeks</b>               | 0 (0%)                                     | 4 (19%)                       | <b>0.015</b>   |
| <b>12 weeks</b>              | 0 (0%)                                     | 6 (28.6%)                     | <b>0.002</b>   |
| <b>1 year</b>                | 4 (11.1%)                                  | 10 (50%)                      | <b>0.003</b>   |
